# Supplementary material for: Tracking HIV-1-Infected Cell Clones Using Integration Site-Specific qPCR
Source: MDPI journal article supplement (doi:10.3390/v13071235), 2021-06-25
Supplement: s1 [file s1]

**Supplementary Table S1.** IS-qPCR Host-HIV-1 Primer Pair and Probe Sequences.

| Donor<br>(Gene in<br>which<br>provirus is<br>integrated) | Host-Specific (FWD)<br>Primer Sequences (5'-3')<br>[Upstream Host-Virus Junction<br>Position of Primer] | HIV-1 Specific (REV)<br>Primer Sequences (5'-3')<br>[5' Position of Primer] | IS-qPCR Probe Sequences (5'-3') | Probe Strand<br>Relative to<br>Provirus |
|----------------------------------------------------------|---------------------------------------------------------------------------------------------------------|-----------------------------------------------------------------------------|---------------------------------|-----------------------------------------|
| C-03<br>(ZNF268)                                         | GAGTCTGGAATTGAATACATG<br>[113]                                                                          | ACAAATCAAGGATGTCTTGTCT<br>[49]                                              | CCAAACTAGCCCTTCCAAGTATACAGTGAT  | Antisense                               |
| C-03<br>(BRCA1)                                          | CAAATCCCAAGTCGTGTG<br>[32]                                                                              | CAGGGAAGTAACCTTGTGTG<br>[78]                                                | CTATATAACTGGAAGGGCTAGTTTGGTCCC  | Sense                                   |
| R-09<br>(ABCA11P)                                        | TGCCTTTGTGCTTTAAGAACTC<br>[52]                                                                          | GAAGTAGCCTTGTGTGTGGTAG<br>[74]                                              | AGATGGTATGTACCCTGGAAGGGCT       | Sense                                   |
| R-09<br>(RAD50)                                          | ATCACATCTACCATTCTGGAC<br>[39]                                                                           | CGTTCTCTTCTTCCATCT<br>[186]                                                 | ATCTCCTGGAAGGGCTAATTTACTCCC     | Sense                                   |
| F-07<br>(ZNF721)                                         | GAATGCTTTACCACACAGTAC<br>[26]                                                                           | GTGTAGTTCTGCCAATCAG<br>[94]                                                 | AGCTGGAAGGGCTAGTTTACTCCCAG      | Sense                                   |
| F-07 (USP48)                                             | ATAAGGCAGGTATGTATTTGG<br>[82]                                                                           | GCCAATCAGGGAAGTAACC<br>[84]                                                 | TAACTGTGAGATTGGAAGGGCTAG        | Sense                                   |
| ACH-2<br>(NT5C3A)                                        | TGAGGAACAGATTTTCTCACATG<br>[40]                                                                         | AGATCAAGGATATCTTGTCTTC<br>[46]                                              | GAATGCTTTGTAATTGGAAGGGCTAATTC   | Sense                                   |

Probes are labeled with a 5' Fluorescein (6-FAM) fluorophore and two quenchers (3' Dark Quencher and an internal ZEN quencher) (IDT) to reduce background fluorescence so the target region can be detected at low levels (see Methods).

**Supplementary Table S2.** LTR Primer Pair and Probe Sequences used in qPCR.

| LTR (FWD)<br>Primer Sequence (5'-3') | LTR (REV)<br>Primer Sequence (5'-3') | LTR Probe Sequence (5'-3') |
|--------------------------------------|--------------------------------------|----------------------------|
| GKGAACCCACTGCTTAAG                   | GTCTGAGGGATCTCTAGPTAC                | TCAATAAAGCTTGCCTTGAGTG     |

Primer sequences were synthesized with internal modified bases, K and P, as published [1]. Probes are labeled with a 5' Fluorescein (6-FAM) fluorophore and a 3' Dark Quencher (NFQ) with a minor groove binder (MGB), which helps to form stable duplexes with the DNA target and increases binding specificity.

**Supplementary Table S3.** Time Points of Donor Samples and Cell Types used for ISA and IS-qPCR.

| Donor | Date of Blood Draw | Cell Type (ISA) |                    | Cell Type (IS-qPCR) |                    |
|-------|--------------------|-----------------|--------------------|---------------------|--------------------|
|       |                    | PBMC            | Total CD4+ T Cells | PBMC                | Total CD4+ T Cells |
| C-03  | 9/20/2014          | X               |                    | X                   |                    |
|       | 11/30/2015         | X               |                    | X                   |                    |
|       | 10/5/2017          |                 | X                  |                     | X                  |
| R-09  | 8/6/2015           | X               | X                  | X                   |                    |
|       | 9/14/2016          | X               |                    | X                   |                    |
| F-07  | 6/3/2015           | X               |                    | X                   |                    |
|       | 4/6/2017           |                 | X                  |                     | X                  |

The clone frequencies of the repliclones presented in Halvas *et al.* 2020 [2] were generated from a compilation of several integration site sequencing assays (ISA) from multiple time points derived from a combination of PBMCs and total CD4+ T cells, denoted by X. To ensure the most accurate comparison of IS-qPCR, we sampled parallel cell types for each donor at each time point, when available (X).

**Supplementary Table S4.** Individual IS-qPCR Intra-Assay Results.

| Donor | Provirus-Specific IS-qPCR Assay | Date of Blood Draw | Number of Replicates Positive for Provirus by IS-qPCR Assay <sup>A</sup> | Average Proviral Copies per Assay <sup>B</sup> | Standard Deviation of Assays <sup>C</sup> |
|-------|---------------------------------|--------------------|--------------------------------------------------------------------------|------------------------------------------------|-------------------------------------------|
| C-03  | ZNF268                          | 10/5/2017          | 6/6                                                                      | 59.1                                           | 7.3                                       |
|       | BRCA1                           |                    | 6/6                                                                      | 3.8                                            | 2.4                                       |
| R-09  | ABCA11P                         | 8/6/2015           | 4/4                                                                      | 6.8                                            | 1.0                                       |
|       | RAD50                           |                    | 2/2                                                                      | 4.7                                            | 2.9                                       |
| F-07  | ZNF721                          | 4/6/2017           | 14/16                                                                    | 1.1                                            | 0.7                                       |
|       | USP48                           |                    | 4/4                                                                      | 2.6                                            | 1.7                                       |

<sup>A</sup> The number of PCR replicates, each replicate consisting of triplicate PCR reactions, in which the provirus of interest was detected (numerator) of the total replicates assayed (denominator).

<sup>B</sup> Average proviral copies across IS-qPCR replicate assays (<sup>A</sup>) in which each replicate consisted of the averages of triplicate PCR reactions.

<sup>C</sup> Standard deviation of IS-qPCR replicate assays, each consisting of triplicate PCR reactions.

**Supplementary Figure S1.** Gel electrophoresis of IS-qPCR product from the F-07 USP48 host-virus junction. The product size is as expected (166 bp) and amplification of the correct target sequence was determined by dideoxy chain termination sequencing (Sanger).

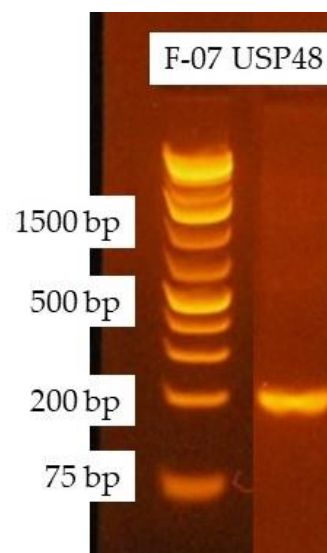

**Supplementary Table S5.** Demographics and Clinical Histories of Donors Referred for Nonsuppressible Viremia

| Donor ID | Age | Sex  | Race             | Date of HIV-1 Diagnosis | Years On ART <sup>A</sup> | Year of Detectable Viremia <sup>B</sup> | Current ART Regimen <sup>C</sup> |
|----------|-----|------|------------------|-------------------------|---------------------------|-----------------------------------------|----------------------------------|
| C-03     | 43  | Male | Caucasian        | 06/1994                 | 9                         | 4.5                                     | DRV/r + ETV + DTG                |
| R-09     | 73  | Male | Caucasian        | 01/2005                 | 10                        | 5.2                                     | TDF/FTC/EFV                      |
| F-07     | 59  | Male | African American | 06/1996                 | 19                        | 2.1                                     | ABC/3TC + EFV                    |

<sup>A</sup> Years on ART at the time of initial evaluation.

<sup>B</sup> Above the limit of detection of FDA-cleared plasma HIV-1 RNA assays.

<sup>C</sup> ABC, abacavir; DRV/r, darunavir/ritonavir; DTG, dolutegravir; EFV, efavirenz; ETV, etravirine; FTC, emtricitabine; TDF, tenofovir disoproxil fumarate; 3TC, lamivudine.

Tabled modified from [2].

**Supplementary Table S6.** Baseline Immunologic and Virologic Characteristics of Donors Referred for Nonsuppressible Viremia

| Donor ID | Pre-ART Plasma HIV-1 RNA (cps/mL) | Nadir CD4+ T Cells (Cells/mm <sup>3</sup> ) | Current CD4+ T Cells (cells/mm <sup>3</sup> ) | Plasma HIV RNA at Referral (cps/mL) <sup>A</sup> | HIV-1 DNA (cps/10 <sup>6</sup> PBMC) <sup>B</sup> | Cell-Associated HIV-1 RNA (cps/10 <sup>6</sup> PBMC) <sup>B</sup> | IUPM <sup>C</sup> |
|----------|-----------------------------------|---------------------------------------------|-----------------------------------------------|--------------------------------------------------|---------------------------------------------------|-------------------------------------------------------------------|-------------------|
| C-03     | 16,700,000                        | 10                                          | 416                                           | 62                                               | 2,505                                             | 1,162                                                             | 1.4               |
| R-09     | 97,000                            | 105                                         | 380                                           | 197                                              | 1,533                                             | 139                                                               | 18.1              |
| F-07     | 117,068                           | 314                                         | 1,023                                         | 52                                               | 1,603                                             | 1,112                                                             | 3.8               |

<sup>A</sup> Plasma HIV-1 RNA copies/mL at time of referral determined by FDA-approved Roche CAP/CTM v2.0 or Abbott M2000 platforms.

<sup>B</sup> HIV-1 DNA and cell-associated RNA copies/million peripheral blood mononuclear cells (PBMC) measured by quantitative polymerase chain reaction [3].

<sup>C</sup> Infectious units per million (IUPM) total CD4+ T cells by quantitative viral outgrowth assay (QVOA) [4,5].

Table modified from [2].

**Supplementary Table S7.** Reagents and Resources Suggested in IS-qPCR Workflow.

|                                                  | Reagent                                            | Resource                                   |
|--------------------------------------------------|----------------------------------------------------|--------------------------------------------|
| <b>Multiple Displacement Amplification</b>       | Phi29 DNA Polymerase and Reaction Mix              | New England BioLabs                        |
|                                                  | Trehalose                                          | Sigma-Aldrich                              |
|                                                  | MgCl <sub>2</sub>                                  | Fisher Scientific                          |
|                                                  | (NH <sub>4</sub> ) <sub>2</sub> SO <sub>4</sub>    | New England BioLabs                        |
|                                                  | BSA                                                | New England BioLabs                        |
|                                                  | Random 6-10-mer                                    | IDT synthesis: phosphorothioate-terminated |
|                                                  | dNTP                                               | New England BioLabs                        |
|                                                  | KOH                                                | G-Biosciences                              |
|                                                  | EDTA                                               | Fisher Scientific                          |
|                                                  | Trizma-HCl                                         | Sigma-Aldrich                              |
|                                                  | Optimization considerations                        | [6,7]                                      |
| <b>DNA Purification</b>                          | KAPA Pure Beads                                    | Kapa Biosystems, Inc.                      |
|                                                  | GeneJET Gel Extraction Kit                         | Thermo Fisher Scientific                   |
| <b>Integrated Proviral Sequencing Assay *</b>    | RANGER DNA Polymerase Mix                          | Bioline                                    |
|                                                  | HIV primers FWD and REV                            | [2]                                        |
|                                                  | Nullomer Adapter                                   | [8]                                        |
|                                                  | Optimization considerations                        | [9,10]                                     |
|                                                  | SuperFi DNA Polymerase                             | Fisher Scientific                          |
| <b>Quantification of DNA</b>                     | 1x TE buffer (5-10 mM Tris-HCl, pH 8.0, 1 mM EDTA) | Fisher Scientific                          |
|                                                  | Quanti-iT™ PicoGreen® dsDNA                        | Thermo Fisher Scientific                   |
| <b>Host-Full-Length_Host (HFH) Amplification</b> | RANGER DNA Polymerase Mix                          | Bioline                                    |
|                                                  | HIV primers FWD and REV                            | Genewiz or IDT                             |
|                                                  | Complement Host Primers                            | Genewiz or IDT                             |
| <b>Amplification of qPCR Standard Template</b>   | RANGER DNA Polymerase Mix                          | Bioline                                    |
|                                                  | HIV REV Primer                                     | [11]                                       |
|                                                  | Host FWD Primer                                    | HFH Nested Primer                          |
| <b>qPCR</b>                                      | LightCycler® 480 Probes Master Mix                 | Roche                                      |
|                                                  | IS-qPCR Host and HIV Primers                       | Genewiz or IDT                             |



|  |                                 |            |
|--|---------------------------------|------------|
|  | IS-qPCR Probe                   | IDT        |
|  | CCR5 TaqMan Control Genomic DNA | Invitrogen |
|  | CCR5 qPCR Primers and Probe     | [3,12]     |

\* Integrated Proviral Sequencing Assay detailed methodology in manuscript under review

1. Kong Lin Thoo, P.; Brown, D.M. Synthesis of oligodeoxyribonucleotides containing degenerate bases and their use as primers in the polymerase chain reaction. *Nucleic Acids Res.* **1992**, *20*, 5149–5152.
2. Halvas, E.K.; Joseph, K.W.; Brandt, L.D.; Guo, S.; Sobolewski, M.D.; Jacobs, J.L.; Tumiotto, C.; Bui, J.K.; Cyktor, J.C.; Keele, B.F.; et al. HIV-1 viremia not suppressible by antiretroviral therapy can originate from large T cell clones producing infectious virus. *J. Clin. Invest.* **2020**, doi:10.1172/jci138099.
3. Hong, F.; Jacobs, J.L.; Aga, E.; Cillo, A.R.; Fyne, E.; Koontz, D.L.; Zheng, L.; Mellors, J.W. Associations between HIV-1 DNA copy number, proviral transcriptional activity, and plasma viremia in individuals off or on suppressive antiretroviral therapy. *Virology* **2018**, *521*, 51–57, doi:10.1016/j.virol.2018.05.018.
4. Siliciano, J.D.; Siliciano, R.F. Enhanced Culture Assay for Detection and Quantitation of Latently Infected, Resting CD4+ T-Cells Carrying Replication-Competent Virus in HIV-1-Infected Individuals. *Methods Mol. Biol.* **2005**, *304*, 3–15, doi:10.1385/1-59259-907-9:003.
5. Rosenbloom, D.I.; Elliott, O.; Hill, A.L.; Henrich, T.J.; Siliciano, J.M.; Siliciano, R.F. Designing and Interpreting Limiting Dilution Assays: General Principles and Applications to the Latent Reservoir for Human Immunodeficiency Virus-1. *Open Forum Infect. Dis.* **2015**, *2*, ofv123, doi:10.1093/ofid/ofv12.
6. Pan, X.; Urban, A.E.; Palejev, D.; Schulz, V.; Grubert, F.; Hu, Y.; Snyder, M.; Weissman, S.M. A procedure for highly specific, sensitive, and unbiased whole-genome amplification. *Proc. Natl. Acad. Sci. U. S. A.* **2008**, *105*, 15499–15504, doi:10.1073/pnas.0808028105.
7. Leichthy, A.R.; Brisson, D. Selective whole genome amplification for resequencing target microbial species from complex natural samples. *Genetics* **2014**, *198*, 473–481, doi:10.1534/genetics.114.165498.
8. Hampikian, G.; Andersen, T. Absent sequences: Nullomers and primes. *Pacific Symp. Biocomput. 2007, PSB 2007* **2007**, *366*, 355–366, doi:10.1142/9789812772435\_0034.
9. Joseph, K.W.; Halvas, E.K.; Brandt, L.D.; Patro, S.C.; Rausch, J.W.; Chopra, A.; Mallal, S.; Kearney, M.F.; Coffin, J.M.; Mellors, J.W. Deep Sequencing Analysis of HIV-1 Proviruses Reveals Frequent Asymmetric Long-Terminal Repeats And Other Novel Proviral Structures. *Manuscr. Submitt.* **2021**.
10. Joseph, K.W.; Halvas, E.K.; Brandt, L.; Patro, S.; Rausch, J.; Chopra, A.; Kearney, M.; Coffin, J.; Mellors, J.W. Efficient High-Throughput Sequencing of Variable and Near Full Length Integrated HIV-1 Proviruses. In *Proceedings of the Conference on Retroviruses and Opportunistic Infections (CROI)*, Boston, MA; Boston, MA, 2020; p. 127.
11. Li, B.; Gladden, A.D.; Altfeld, M.; Kaldor, J.M.; Cooper, D.A.; Kelleher, A.D.; Allen, T.M. Rapid Reversion of Sequence Polymorphisms Dominates Early Human Immunodeficiency Virus Type 1 Evolution. *J. Virol.* **2007**, *81*, 193–201, doi:10.1128/jvi.01231-06.
12. Malnati, M.S.; Scarlatti, G.; Gatto, F.; Salvatori, F.; Cassina, G.; Rutigliano, T.; Volpi, R.; Lusso, P. A universal real-time PCR assay for the quantification of group-M HIV-1 proviral load. *Nat. Protoc.* **2008**, *3*, 1240–1248, doi:10.1038/nprot.2008.108.
